# Supplementary material
Source: publisher figshare collection journal article supplement (https://brill.figshare.com/articles/dataset/_/26362996)
Supplement: Supplementary file 1 [file 1]

# SHARK BITE - PRELIMINARY INFORMATION FORM

## INFORMANT IDENTITY

Surname:   
 Name:   
 E-mail:   
 Tel.:

## VICTIM ID

Surname:   
 Name:   
 E-mail:   
 Tel.:

Sex: M ☐ W ☐  
 Age:   
 Size:  cm  
 Birth place:

**BITE** Date:  Hour:  Place (island):   
☐ Outer slope ☐ Reef passage ☐ Inside lagoon ☐ Surface ☐ Depth:  m

## Location of bite(s):

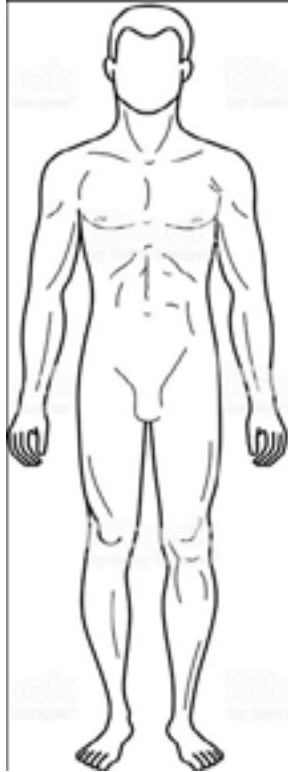

## Species ID of shark:

- ☐ **Raira - Gray reef shark**  
*Carcharhinus amblyrhynchos*  
☐ **Mauri/Vaki - Blacktip reef shark**  
*C. melanopterus*  
☐ **Arava - Lemon shark**  
*Negaprion acutidens*  
☐ **Tapete - Silvertip shark** - *C. albimarginatus*  
☐ **Parata - Oceanic whitetip** - *Carcharhinus longimanus*  
☐ **Tore Tore/ Tangutukao - tiger sharks** - *Galeocerdo cuvier*  
☐ **Kokihe/O'Hi'e/Tautu'o- Blacktip shark** - *C. limbatus*  
☐ **Aahi/Gagahi - Mako shark**  
*Isurus spp.*  
☐ **Rehirehi - Silky shark**  
*Carcharhinus falciformis*  
☐ **Othe species:**

## Reliability of assessment:

☐ 100% ☐ 70-99% ☐ < 70%

## Duration of main bite :

☐ < 2 s ☐ 2 à 4 s ☐ 5 à 8 s ☐ > 8 s

## Did the shark shake its head ?

☐ no ☐ yes How many times?

## Was human flesh removed?

☐ no ☐ yes ☐ + ☐ ++ ☐ ++++

## Victim's activity

- ☐ Spearfishing (pupuhi)  
☐ Free diving (without fishing)  
☐ Snorkelling (surface)  
☐ Whale-watching (surface)  
☐ Scuba -diving ☐ open ☐ closed  
☐ Surf or paddle board ☐ Kite surf  
☐ Stand (in the water) fishing  
☐ Observation (standing in water)  
☐ other:

## SHARK BEHAVIOUR

-How many shark (same species) did bite ?

-If other species: which, and how many ?

-Were the shark(s) nervous? ☐ no ☐ yes ☐ all ☐ only some ☐ the one which bit

-if yes which agonistic displays (cross several if necessary)?  
☐ Lowering pectoral fins ☐ Ascending trajectory (with acceleration)  
☐ Gaping ☐ Hunching swimming  
☐ Gill flapping ☐ Closing nictitating membrane

## BASIC BITE CONTEXT

-Did victim see the shark before the bite ?

☐ yes ☐ no

-Was victim alone ? ☐ yes ☐ no, at least another person at a distance of  m

-Was the shark already on the spot ? ☐ yes ☐ no, the shark followed the victim or came after

-Was there some *feeding* activity wether voluntary (artificial provisioning) or involuntary (cleaning fish) ? ☐ no ☐ yes -Was there? ☐ feeding frenzy ☐ no feeding frenzy

-Was the victim holding fish ? ☐ no ☐ Yes, closed by ☐ in hands just before the bite

-Was the fish alive? ☐ no ☐ yes, but inert ☐ yes with agony signs (sounds and vibrations)

-Was the bitten victim's body part covered ? with suit ? gloves ? ☐ yes ☐ no

-Was there any stimulating sounds ? ☐ no ☐ yes, splashing ☐ yes, fish sounds ☐ yes, other

-Was the victim holding: ☐ UW camera ☐ large dome with UW camera ☐ with strobe

-did the victim have any physical contact with the shark prior to the bite? ☐ no

☐ yes, he/she: ☐ touched (or try to) the shark ☐ hit the shark with a spear ☐ shot the shark

**Send to Dr Eric CLUA - eric.clua@gmail.com - Vini: 87229602**
