# Supplementary material
Source: publisher figshare collection journal article supplement (https://brill.figshare.com/articles/dataset/_/26362996)

**ESM 3**

Pairwise comparison of the number of monthly bites per year (in red, significant results):


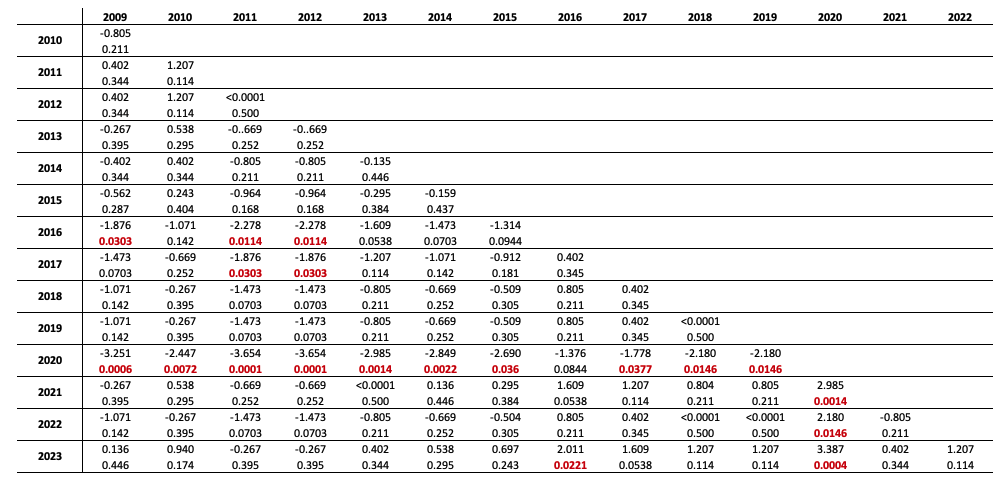


Pairwise comparison of the number of dominant bites per periods (in red, significant results):


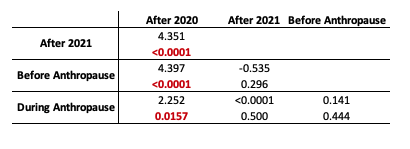


Pairwise comparison of the number of monthly agonistic behaviours per period (in red, significant results):


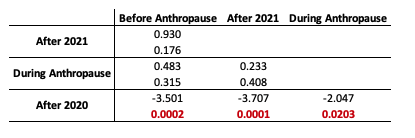


Pairwise comparison of the ratio of agonistic behaviour / dominance bites per periods (in red, significant results):


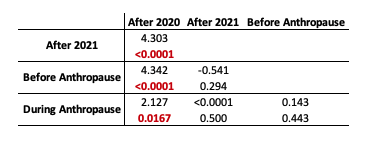


Pairwise comparison of the number of bites per year in Tuamotu by periods (in red, significant results):


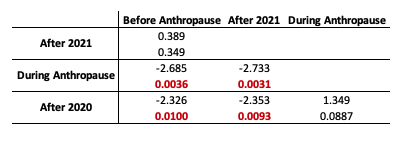

Supplement: Supplementary file 1 [file 1]
